# Supplementary material for: Structurally isomeric ditopic 2-mercaptobenzoxazole and 2-hydroxybenzothiazole as ligands for design of 2D sodium-based luminescent coordination polymers
Source: Royal Society of Chemistry journal article supplement (doi:10.1039/d4dt03427a), 2025-01-01
Supplement: d4dt03427a1.pdf [file d4dt03427a1.pdf]

## Structurally Isomeric Ditopic 2-Mercaptobenzoxazole and 2-Hydroxybenzothiazole as Ligands for Design of 2D Sodium-Based Luminescent Coordination Polymers

Anton F. Rogozhin<sup>a</sup>, Vasily A. Ilichev<sup>a</sup>, Dmitry I. Pavlov<sup>b</sup>, Michail N. Bochkarev<sup>a</sup>

- a- G.A. Razuvaev Institute of Organometallic Chemistry of Russian Academy of Sciences, Tropinina 49, 603950 Nizhny Novgorod, Russian Federation.  
b- Nikolaev Institute of Inorganic Chemistry, Siberian Branch of the Russian Academy of Sciences, 3 Lavrentiev Ave., 630090 Novosibirsk, Russia

### Table of contents

|                                                                                                         |    |
|---------------------------------------------------------------------------------------------------------|----|
| Figure S1. <sup>1</sup> H NMR spectrum of H <sub>2</sub> L <sup>1</sup> in DMSO-d <sub>6</sub> .....    | 2  |
| Figure S2. <sup>13</sup> C NMR spectrum of H <sub>2</sub> L <sup>1</sup> in DMSO-d <sub>6</sub> .....   | 2  |
| Figure S3. <sup>1</sup> H NMR spectrum of H <sub>2</sub> L <sup>2</sup> in DMSO-d <sub>6</sub> .....    | 3  |
| Figure S4. <sup>13</sup> C NMR spectrum of H <sub>2</sub> L <sup>2</sup> in DMSO-d <sub>6</sub> .....   | 3  |
| Figure S5. FTIR spectra of H <sub>2</sub> L <sup>1</sup> and CPs <b>1</b> and <b>2</b> .....            | 4  |
| Figure S6. FTIR spectra of H <sub>2</sub> L <sup>2</sup> and CP <b>3</b> . ....                         | 4  |
| Figure S7. Mass-spectrum of H <sub>2</sub> L <sup>1</sup> .....                                         | 5  |
| Figure S8. Mass-spectrum of H <sub>2</sub> L <sup>2</sup> .....                                         | 5  |
| Figure S9. TG curves of <b>1-3</b> . ....                                                               | 6  |
| Figure S10. PL and PL excitation spectra of <b>1</b> and <b>3</b> in DME solution. ....                 | 6  |
| Figure S11. Absorption spectra of <b>1</b> and <b>3</b> in DME. ....                                    | 7  |
| Figure S12. PL decay curves of <b>1</b> at 380 nm and <b>3</b> at 405 nm in DME solution at 298 K. .... | 7  |
| Figure S13. PL decay curve of <b>1</b> at 530 nm in DME solution at 77 K.....                           | 8  |
| Figure S14. PL decay curve of <b>2</b> at 530 nm in DME solution at 77 K.....                           | 8  |
| Figure S15. PL decay curves of <b>1-3</b> at 405 nm in solid state at 298 K. ....                       | 9  |
| Figure S16. PL decay curves of <b>1-3</b> at 530 nm in solid state at 298 K. ....                       | 9  |
| Figure S17. PL decay curves of <b>1-3</b> at 405 nm in solid state at 77 K. ....                        | 10 |
| Figure S18. PL decay curves of <b>1-3</b> at 530 nm in solid state at 77 K. ....                        | 10 |
| Table S1. Crystal data for <b>1-3</b> .....                                                             | 11 |

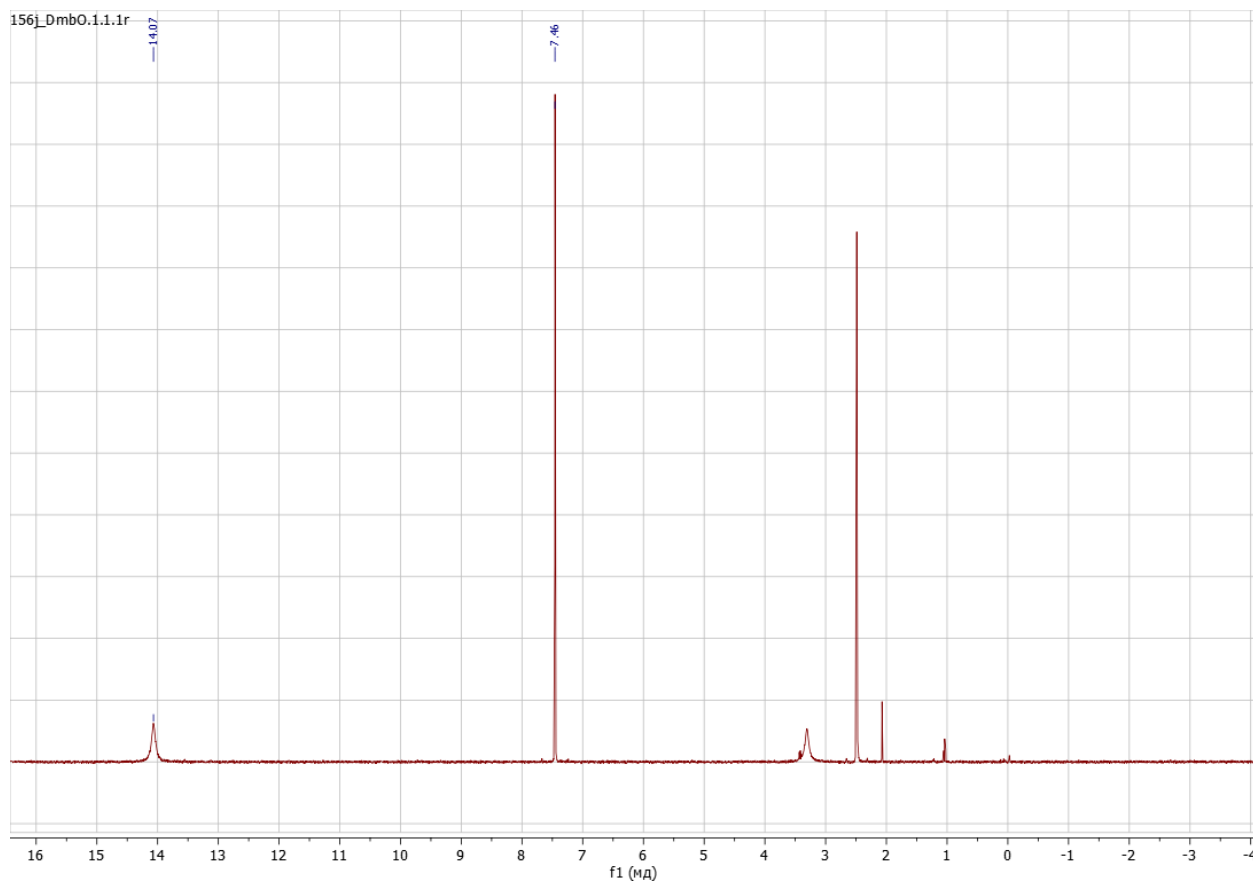

Figure S1.  $^1\text{H}$  NMR spectrum of  $\text{H}_2\text{L}^1$  in  $\text{DMSO-d}_6$ .

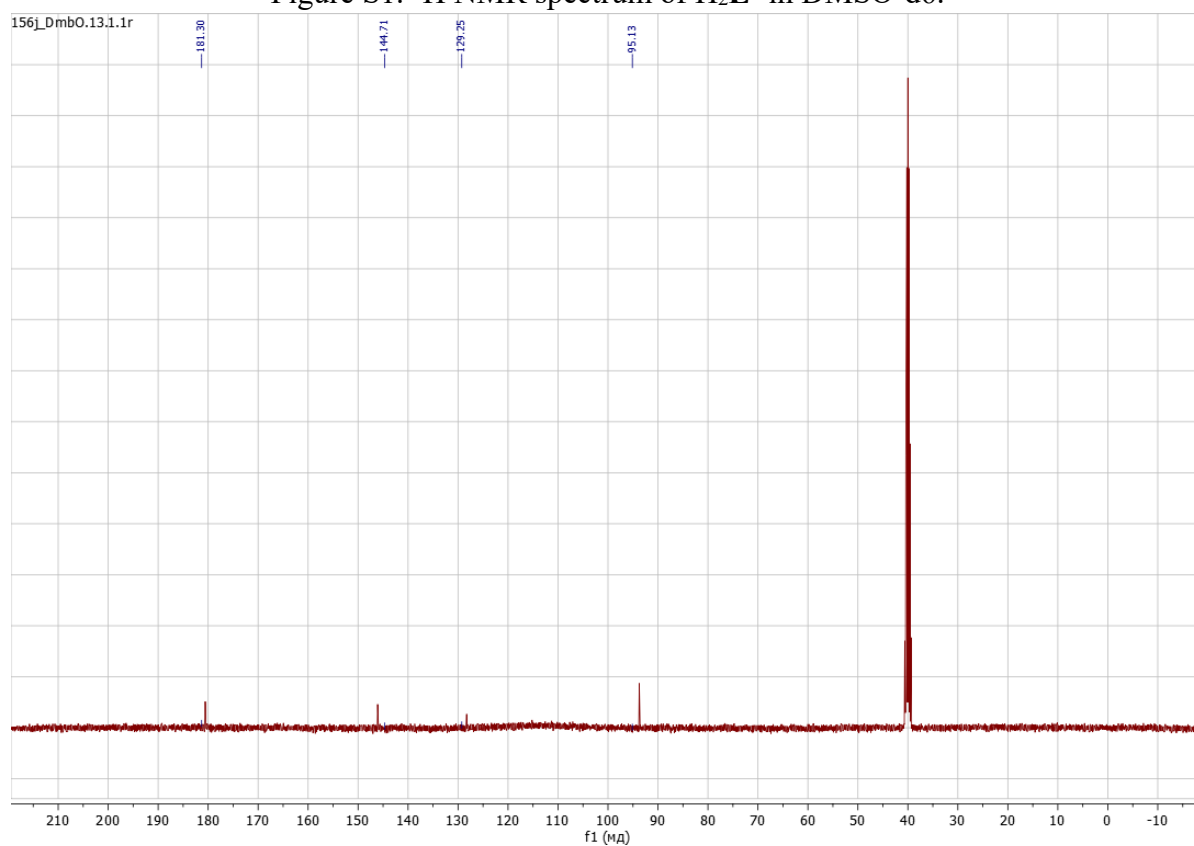

Figure S2.  $^{13}\text{C}$  NMR spectrum of  $\text{H}_2\text{L}^1$  in  $\text{DMSO-d}_6$ .

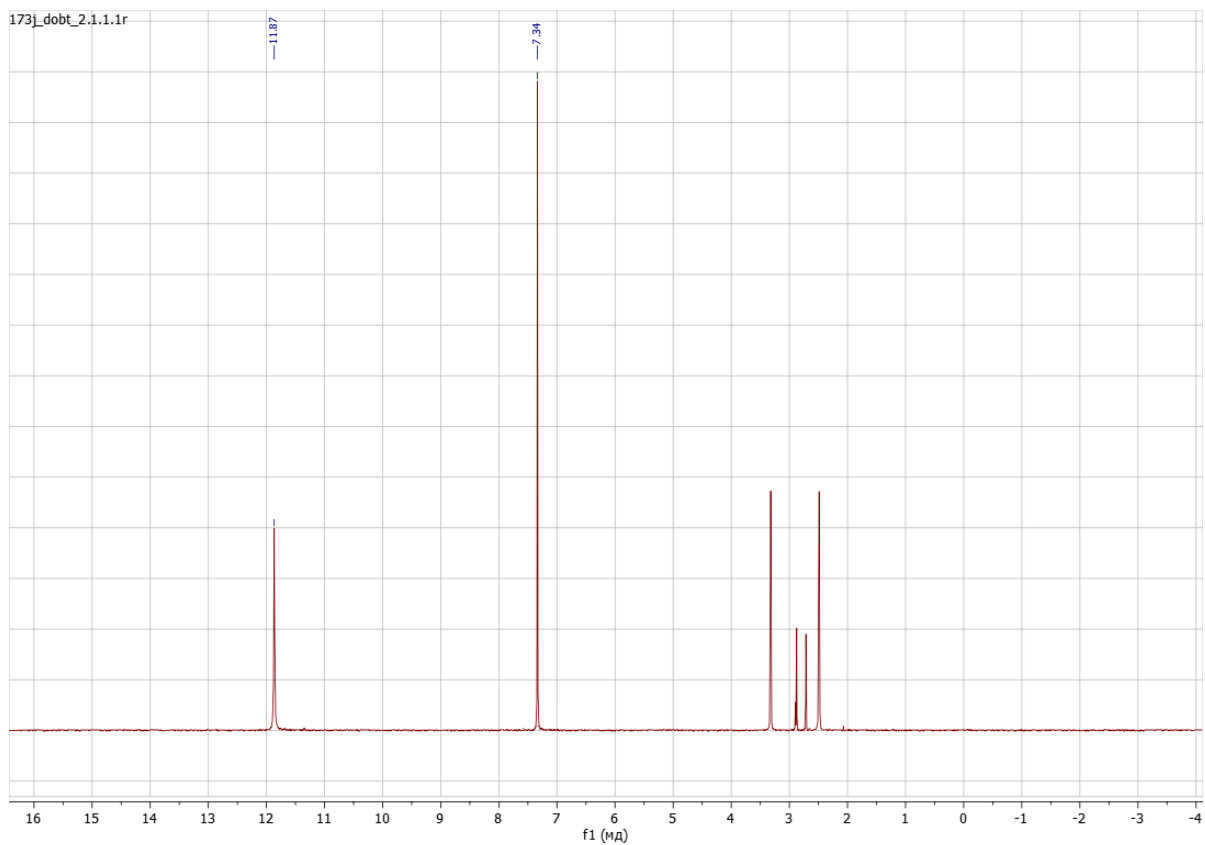

Figure S3.  $^1\text{H}$  NMR spectrum of  $\text{H}_2\text{L}^2$  in  $\text{DMSO-d}_6$ .

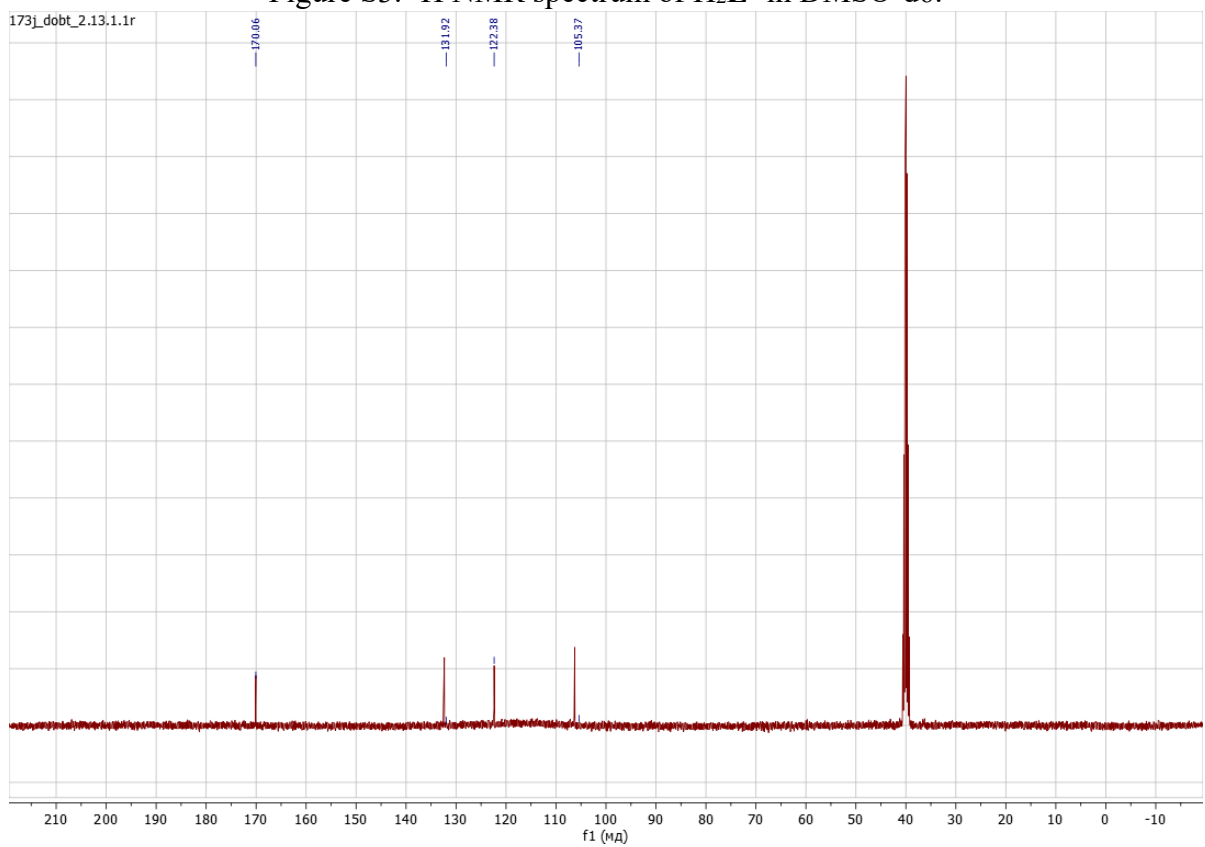

Figure S4.  $^{13}\text{C}$  NMR spectrum of  $\text{H}_2\text{L}^2$  in  $\text{DMSO-d}_6$ .

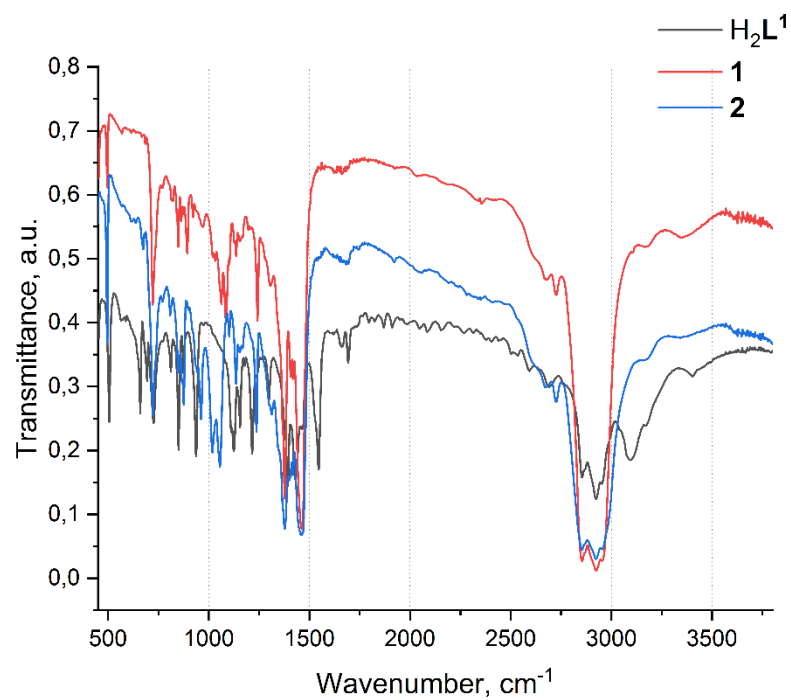

Figure S5. FTIR spectra of H<sub>2</sub>L<sup>1</sup> and CPs **1** and **2**.

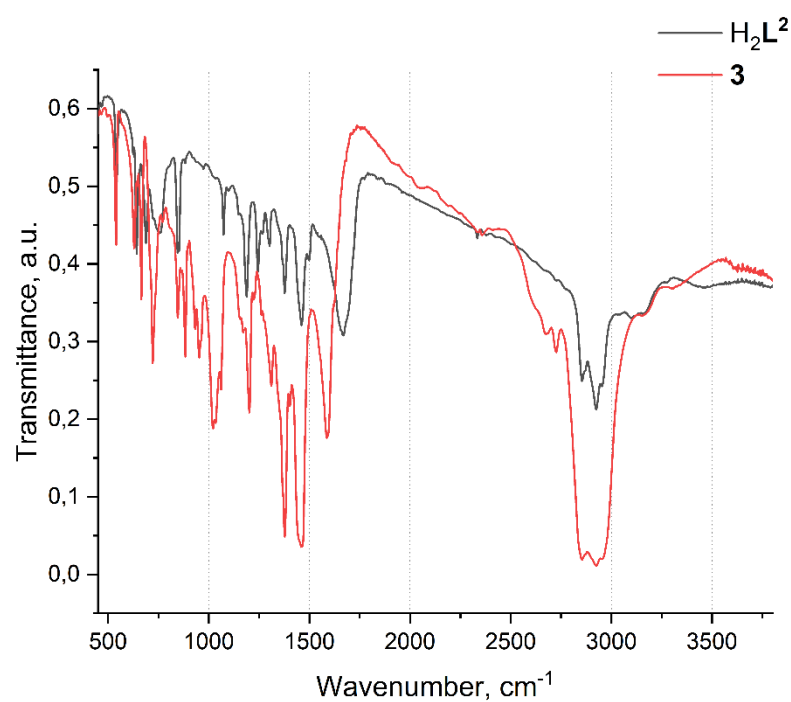

Figure S6. FTIR spectra of H<sub>2</sub>L<sup>2</sup> and CP **3**.

043\_Rogozhin1 #420-455 RT: 3.53-3.82 AV: 36 SB: 75 2.67-3.27 NL: 2.70E5  
T: + c Full ms [ 50.00-500.00]

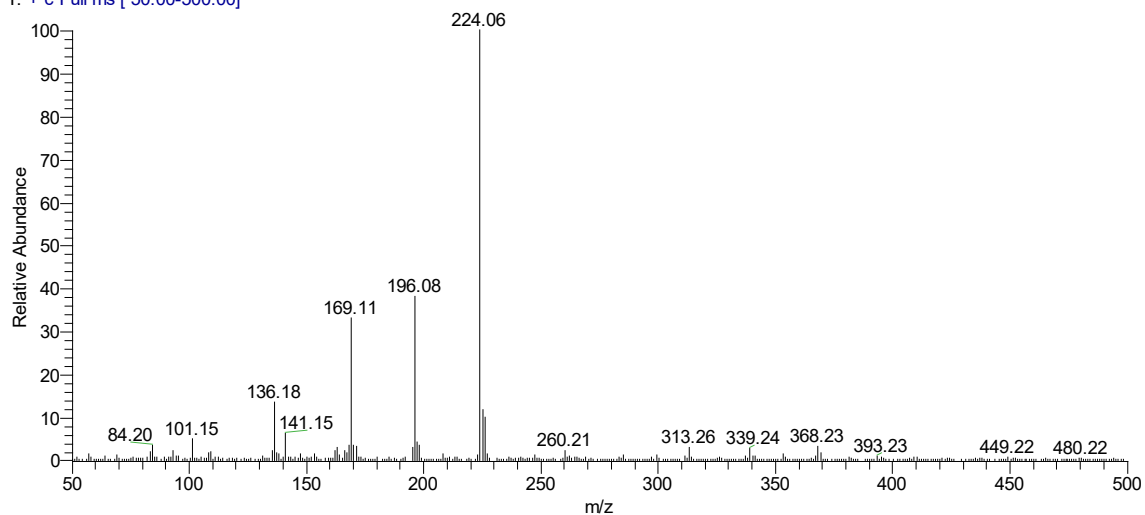

Figure S7. Mass-spectrum of H<sub>2</sub>L<sup>1</sup>.

037\_Rogozhin1 #524-565 RT: 4.33-4.67 AV: 42 NL: 2.34E5  
T: + c Full ms [ 50.00-500.00]

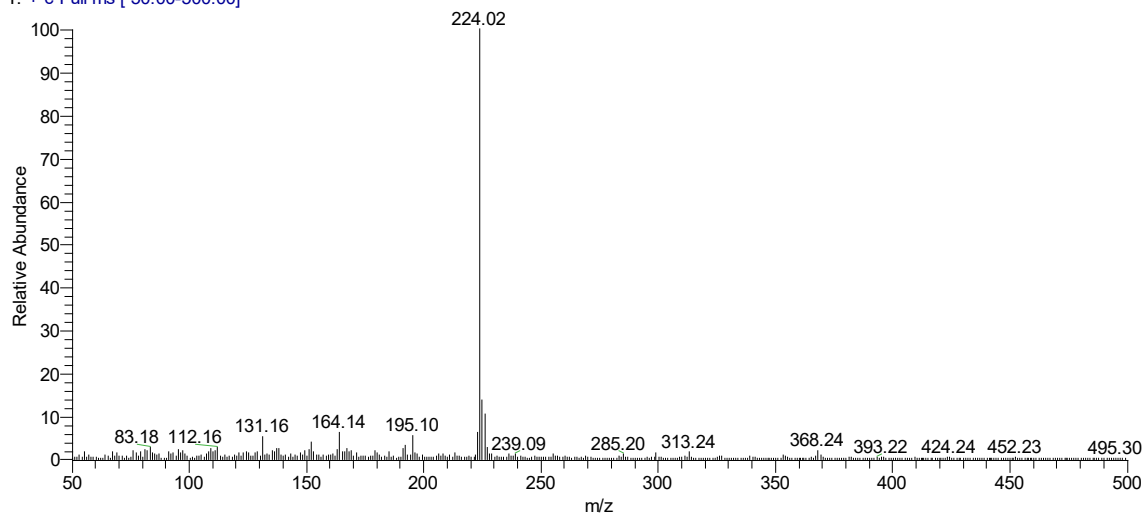

Figure S8. Mass-spectrum of H<sub>2</sub>L<sup>2</sup>.

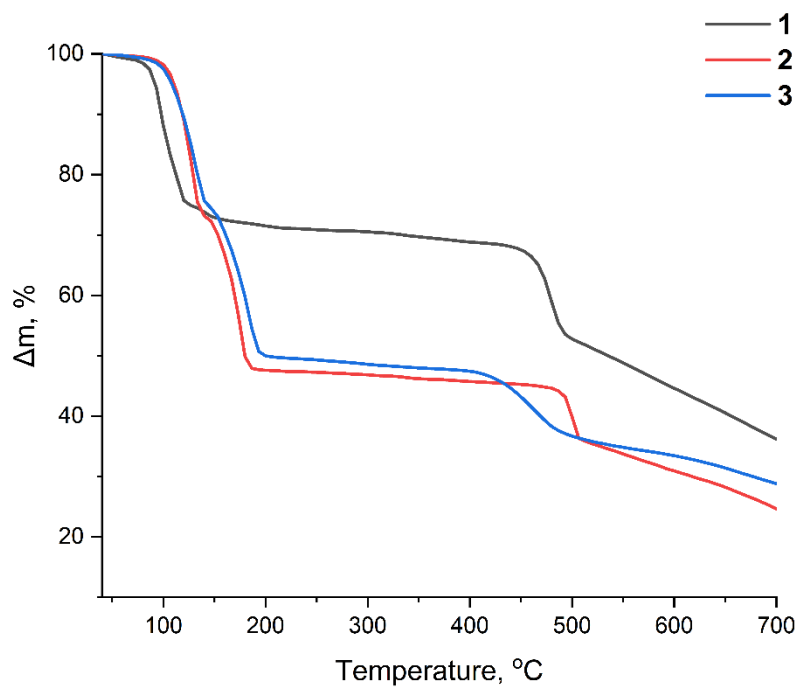

Figure S9. TG curves of **1-3**.

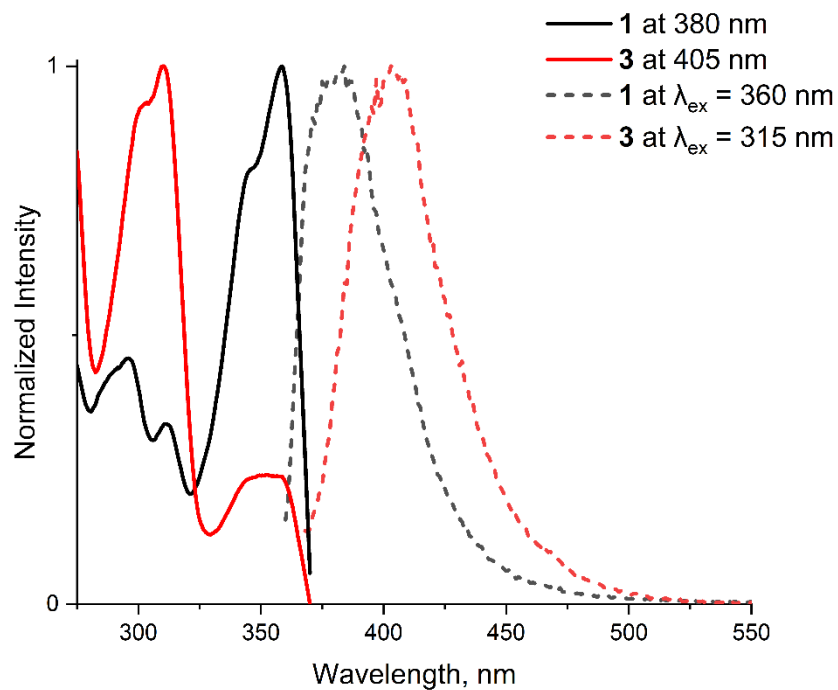

Figure S10. PL and PL excitation spectra of **1** and **3** in DME solution.

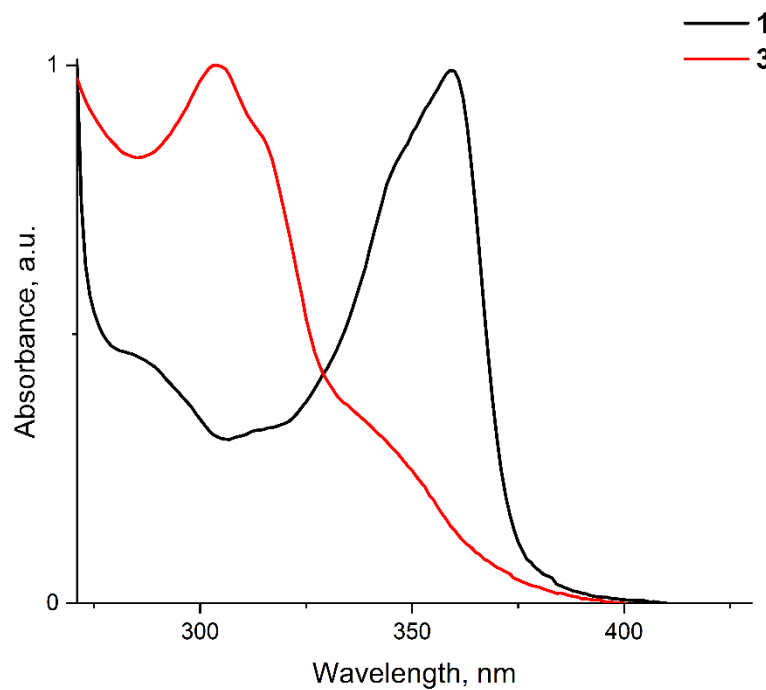

Figure S11. Absorption spectra of **1** and **3** in DME.

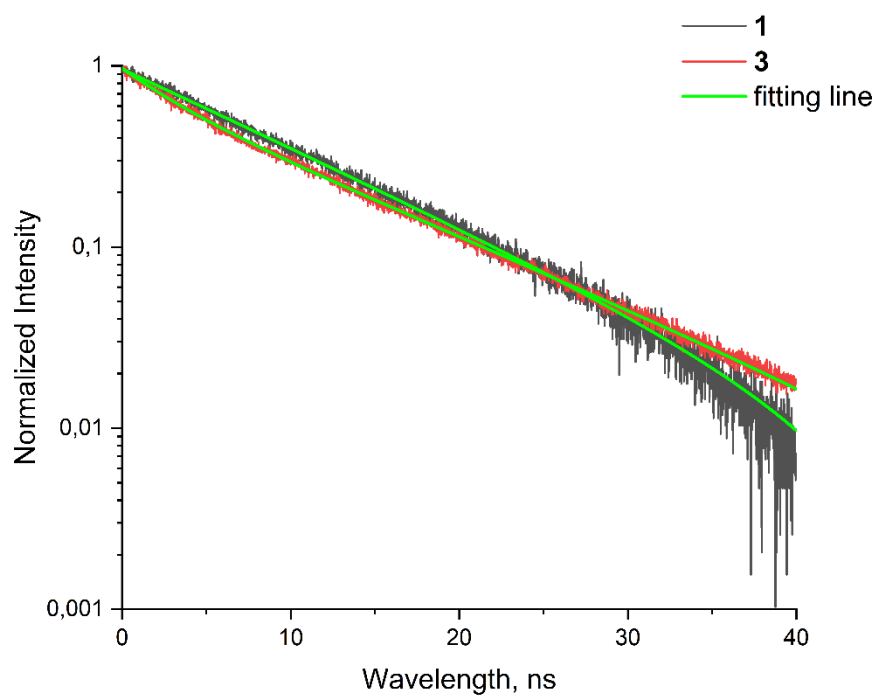

Figure S12. PL decay curves of **1** at 380 nm and **3** at 405 nm in DME solution at 298 K.

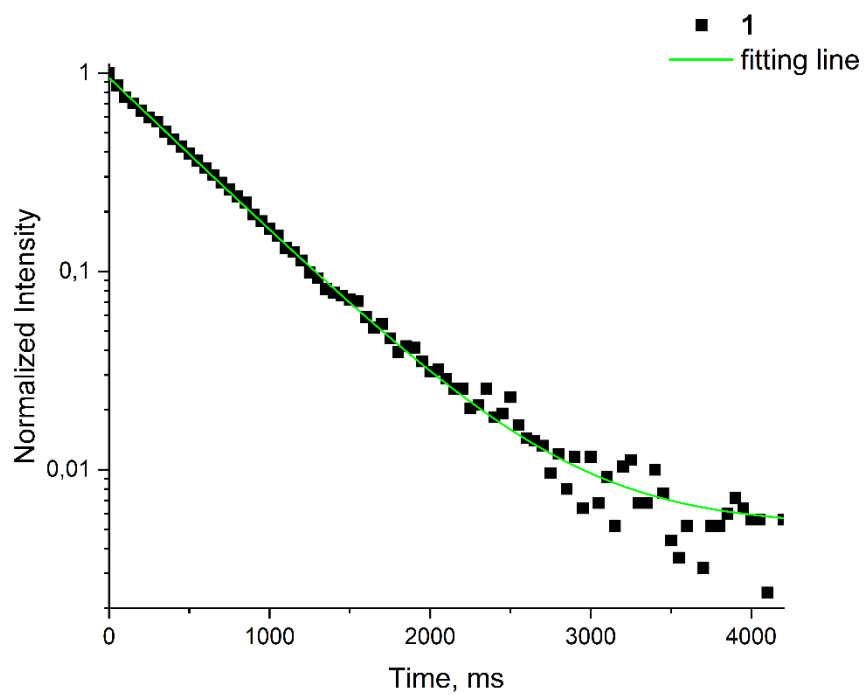

Figure S13. PL decay curve of **1** at 530 nm in DME solution at 77 K.

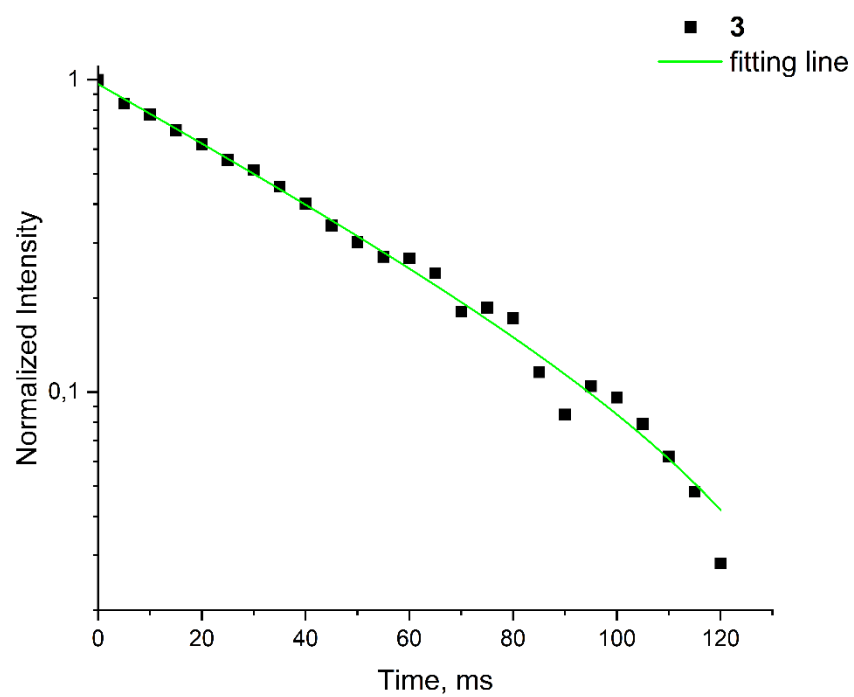

Figure S14. PL decay curve of **2** at 530 nm in DME solution at 77 K.



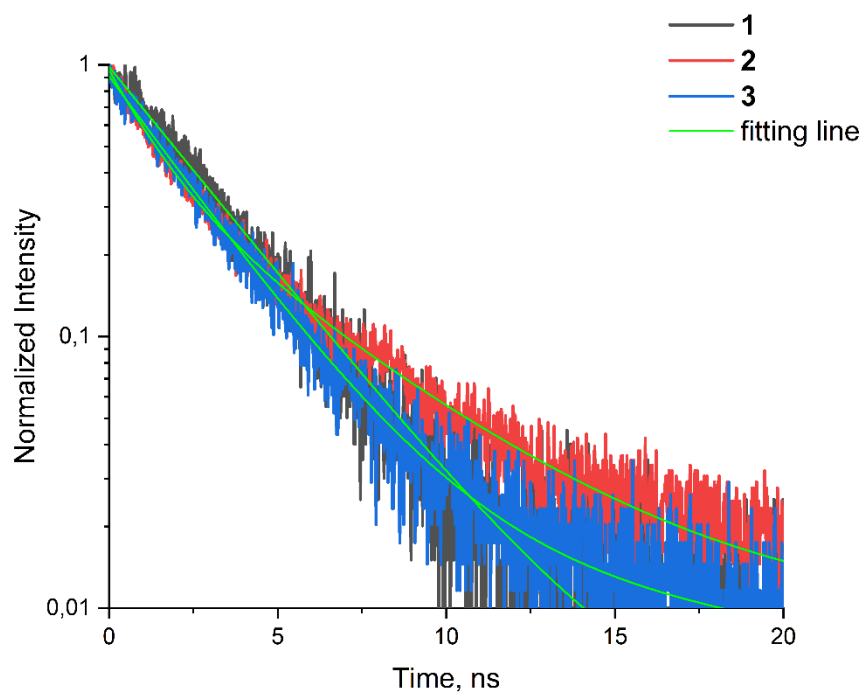

Figure S15. PL decay curves of **1-3** at 405 nm in solid state at 298 K.

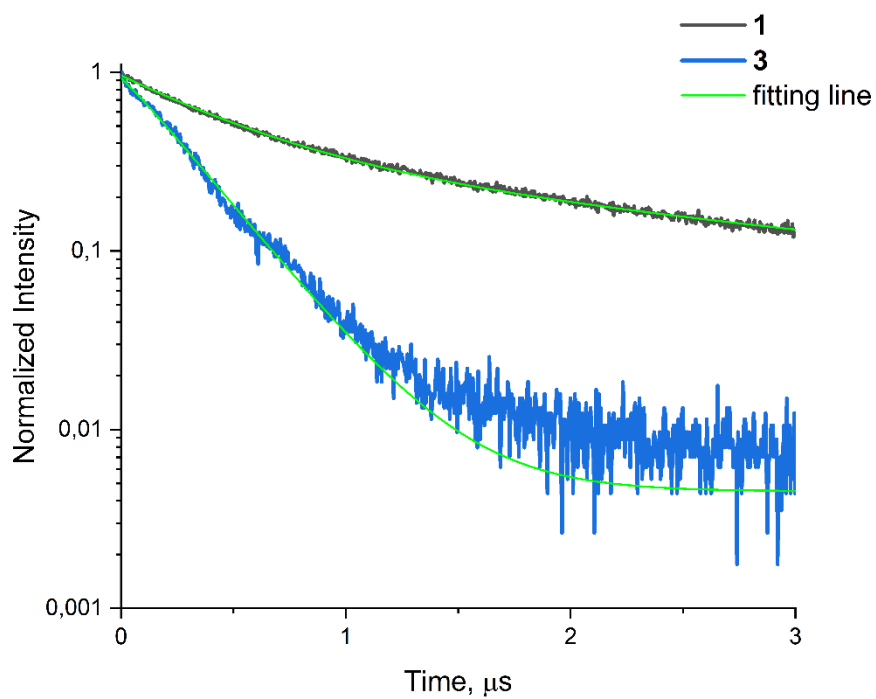

Figure S16. PL decay curves of **1-3** at 530 nm in solid state at 298 K.

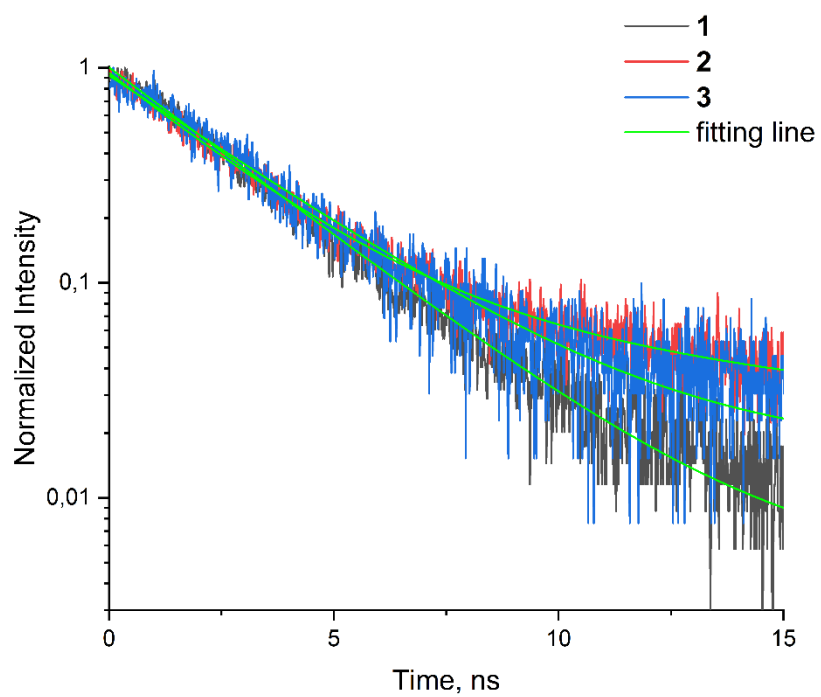

Figure S17. PL decay curves of **1-3** at 405 nm in solid state at 77 K.

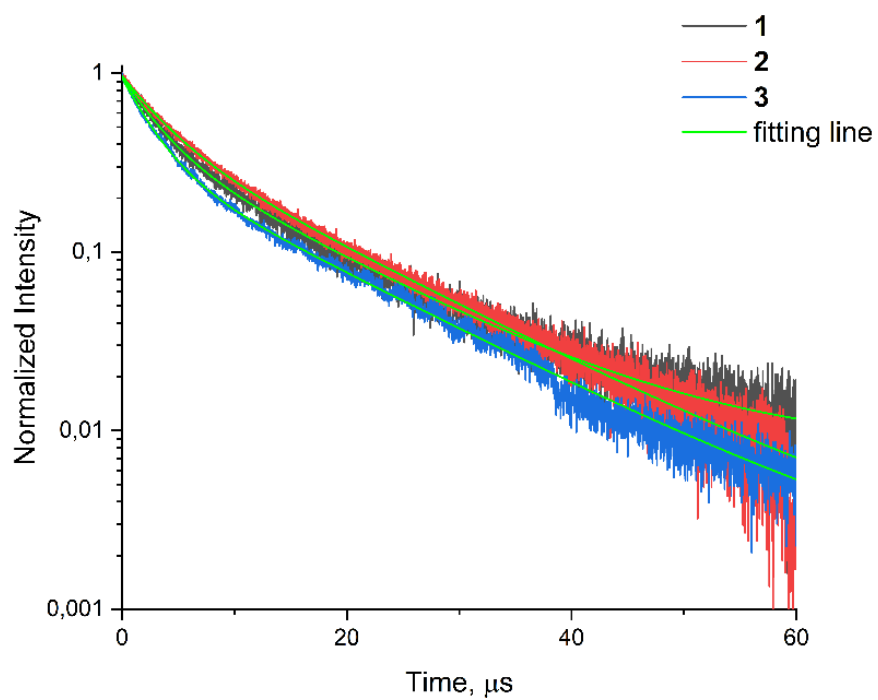

Figure S18. PL decay curves of **1-3** at 530 nm in solid state at 77 K.

Table S1. Crystal data for **1-3**.

| Compound                                                                   | <b>1</b>                                           | <b>2</b>                                                                                     | <b>3</b>                                                                                     |
|----------------------------------------------------------------------------|----------------------------------------------------|----------------------------------------------------------------------------------------------|----------------------------------------------------------------------------------------------|
| Chemical formula                                                           | C <sub>8</sub> H <sub>11</sub> NO <sub>3</sub> SNa | C <sub>16</sub> H <sub>26</sub> N <sub>2</sub> O <sub>6</sub> S <sub>6</sub> Na <sub>2</sub> | C <sub>24</sub> H <sub>39</sub> N <sub>3</sub> Na <sub>3</sub> O <sub>9</sub> S <sub>9</sub> |
| $M_r$                                                                      | 224.23                                             | 580.73                                                                                       | 871.09                                                                                       |
| Crystal system, space group                                                | Monoclinic, $P2_1/c$                               | Monoclinic, $P2_1/n$                                                                         | Monoclinic, $P2_1/c$                                                                         |
| Temperature (K)                                                            | 220                                                | 150                                                                                          | 150                                                                                          |
| $a, b, c$ (Å)                                                              | 6.2801 (5), 11.4240 (8), 14.7832 (9)               | 14.4519 (7), 13.6441 (7), 14.8205 (8)                                                        | 9.6370 (3), 21.2068 (7), 19.2452 (7)                                                         |
| $\beta$ (°)                                                                | 95.063 (2)                                         | 112.633 (2)                                                                                  | 95.360 (1)                                                                                   |
| $V$ (Å <sup>3</sup> )                                                      | 1056.47 (13)                                       | 2697.3 (2)                                                                                   | 3915.9 (2)                                                                                   |
| $Z$                                                                        | 4                                                  | 4                                                                                            | 4                                                                                            |
| Radiation type                                                             | Mo $K\alpha$                                       | Mo $K\alpha$                                                                                 | Mo $K\alpha$                                                                                 |
| $\mu$ (mm <sup>-1</sup> )                                                  | 0.33                                               | 0.57                                                                                         | 0.59                                                                                         |
| Crystal size (mm)                                                          | 0.20 × 0.08 × 0.06                                 | 0.20 × 0.12 × 0.12                                                                           | 0.12 × 0.03 × 0.03                                                                           |
| $T_{\min}, T_{\max}$                                                       | 0.689, 0.745                                       | 0.693, 0.741                                                                                 | 0.671, 0.745                                                                                 |
| No. of measured, independent and observed [ $I > 2\sigma(I)$ ] reflections | 10153, 2158, 1864                                  | 15929, 15929, 10678                                                                          | 36188, 7462, 4482                                                                            |
| $R_{\text{int}}$                                                           | 0.031                                              | -                                                                                            | 0.121                                                                                        |
| $(\sin \theta/\lambda)_{\text{max}}$ (Å <sup>-1</sup> )                    | 0.625                                              | 0.716                                                                                        | 0.611                                                                                        |
| $R[F^2 > 2\sigma(F^2)], wR(F^2), S$                                        | 0.030, 0.082, 1.08                                 | 0.063, 0.165, 1.05                                                                           | 0.055, 0.120, 1.01                                                                           |
| No. of reflections                                                         | 2158                                               | 15929                                                                                        | 7462                                                                                         |
| No. of parameters                                                          | 129                                                | 346                                                                                          | 484                                                                                          |
| No. of restraints                                                          | -                                                  | 48                                                                                           | 36                                                                                           |
| H-atom treatment                                                           | H-atom parameters constrained                      | H-atom parameters constrained                                                                | H-atom parameters constrained                                                                |
| $\Delta\rho_{\text{max}}, \Delta\rho_{\text{min}}$ (e Å <sup>-3</sup> )    | 0.23, -0.20                                        | 1.20, -1.22                                                                                  | 0.70, -0.51                                                                                  |
